# Supplementary material for: Effect of Ginger on Chemical Composition, Physical and Sensory Characteristics of Chicken Soup
Source: MDPI journal article supplement (doi:10.3390/foods10071456), 2021-06-23
Supplement: s1 [file s1]

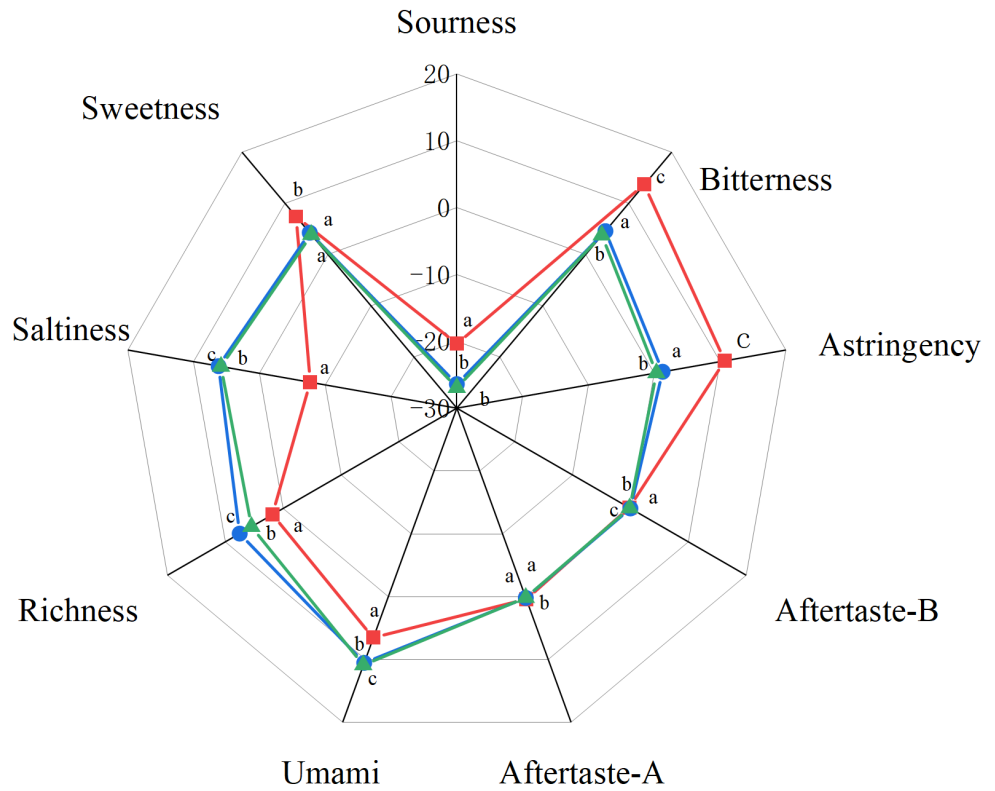

**Figure S1.** Radar chart of electronic tongue data with different soups. —■— represents ginger soup, —▲— represents chicken soup, and —●— represents ginger chicken soup.

**Table S1.** The color of different soups.

| Samples             | L *                       | A *                       | B *                      |
|---------------------|---------------------------|---------------------------|--------------------------|
| Ginger soup         | 80.75 ± 0.10 <sup>a</sup> | -0.21 ± 0.04 <sup>a</sup> | 3.22 ± 0.42 <sup>a</sup> |
| Chicken soup        | 85.03 ± 1.00 <sup>b</sup> | -0.20 ± 0.17 <sup>a</sup> | 3.19 ± 1.47 <sup>a</sup> |
| Ginger chicken soup | 79.69 ± 0.26 <sup>a</sup> | -0.04 ± 0.08 <sup>a</sup> | 2.88 ± 0.74 <sup>a</sup> |

Means in the same row with no common superscript differed significantly ( $p < 0.05$ ).

**Table S2.** EUC values of different soups.

| Sample               | EUC (g MSG/100 g)         |
|----------------------|---------------------------|
| Ginger broth         | 0.06 ± 0.01 <sup>a</sup>  |
| Chicken broth        | 16.64 ± 0.27 <sup>b</sup> |
| Ginger chicken broth | 19.54 ± 1.35 <sup>c</sup> |

Means in the same row with no common superscript differed significantly ( $p < 0.05$ ).
